# Supplementary material for: Barriers and facilitators for clinical trial participation of underrepresented and non-underrepresented fibromyalgia patients: A cross-sectional internet survey
Source: PubMed Central journal article supplement — Heliyon. 2021 Jul 5;7(7):e07475. doi: 10.1016/j.heliyon.2021.e07475 (PMC8278426; doi:10.1016/j.heliyon.2021.e07475), 2021-07-05
Supplement: mmc1.pdf [file mmc1.pdf]

## 1. GoogleAd

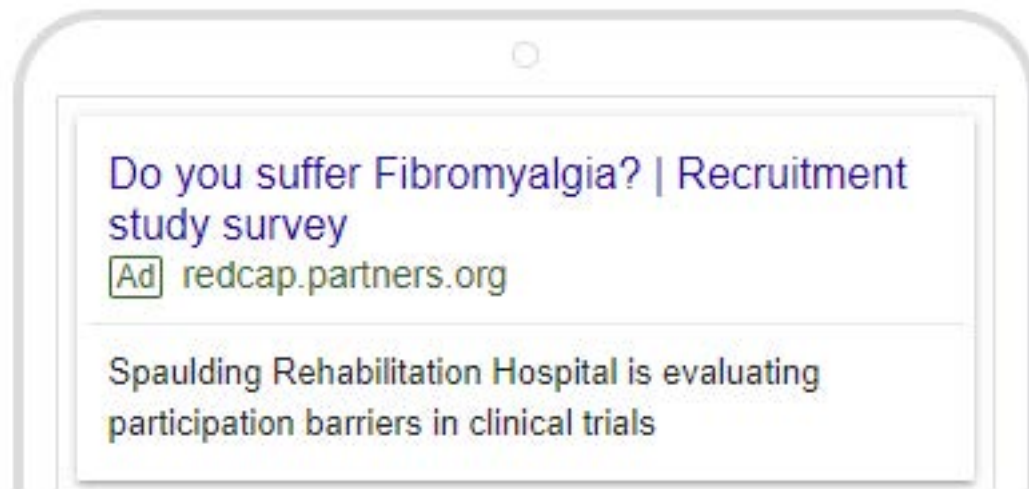

## 2. REDcap Survey

### Optimized tDCS for fibromyalgia: targeting the endogenous pain control system

Please complete the survey below.

Thank you!

---

Would you like to read the information in English or Spanish?/ ¿Desearia leer la información en Ingles o Español?

English / Ingles    Spanish / Español

---

Optimized tDCS for fibromyalgia: targeting the endogenous pain control system

Recruitment study survey

The aim of this survey is to understand the barriers for recruitment and retention of fibromyalgia patients in clinical trials, in order to develop better strategies to increase underrepresented population participation in these studies and contribute to the search for new effective treatments for fibromyalgia.

Do you agree to the information above and want to proceed with the anonymous survey?

Yes    No

---

TDCS optimizado para la fibromialgia: dirigido al sistema de control del dolor endógeno

Encuesta de estudio de reclutamiento

El objetivo de esta encuesta es comprender las barreras para el reclutamiento y la retención de pacientes con fibromialgia en ensayos clínicos, con el fin de desarrollar mejores estrategias para aumentar la participación de la población subrepresentada en estos estudios y contribuir a la búsqueda de nuevos tratamientos efectivos para la fibromialgia.

¿Está de acuerdo con la información anterior y desea continuar con la encuesta anónima?

Si    No

---

#### **Fibromyalgia / Fibromialgia**

Have you been diagnosed with fibromyalgia?"    Yes    No

---

¿Ha sido usted diagnosticado con fibromialgia?"    Si    No

---

How long have you been diagnosed with fibromyalgia?

\_\_\_\_\_

(Years)

---

¿Hace cuánto tiempo le han diagnosticado fibromialgia?

\_\_\_\_\_

(Años)

---

---

How much pain did you feel, on average over the last 6 months, on a scale of 0-10, 0 being no pain and 10 being the worst imaginable pain?

\_\_\_\_\_

((0-10 scale))

---

¿Cuánto dolor sintió, en promedio en los últimos 6 meses, en una escala de 0-10, 0 sin dolor y 10 siendo el peor dolor imaginable?

\_\_\_\_\_

((escala 0-10))

---

Demographic and Socioeconomic data

Age

\_\_\_\_\_

---

Demographic and Socioeconomic data

Edad

\_\_\_\_\_

---

Sex (assigned at birth)

- Female
  - Male
- 

Sexo (asignado al nacer)

- Mujer
  - Hombre
- 

To which gender identity do you most identify?

- Female
  - Male
  - Non-binary
  - Prefer not to answer
  - Other
- 

¿Con qué identidad de género te identificas más?

- Mujer
  - Hombre
  - No-binario
  - Prefiero no responder
  - Otro
- 

Other

\_\_\_\_\_

---

Otro

\_\_\_\_\_

---

---

|      |                                                                                                                                                                                                                                                                                                                                                                               |
|------|-------------------------------------------------------------------------------------------------------------------------------------------------------------------------------------------------------------------------------------------------------------------------------------------------------------------------------------------------------------------------------|
| Race | <input type="radio"/> American Indian or Alaska Native.<br><input type="radio"/> Asian.<br><input type="radio"/> Black or African American.<br><input type="radio"/> Native Hawaiian or other Pacific Islander.<br><input type="radio"/> White<br><input type="radio"/> Two or more races<br><input type="radio"/> Race Unknown<br><input type="radio"/> Prefer not to answer |
|------|-------------------------------------------------------------------------------------------------------------------------------------------------------------------------------------------------------------------------------------------------------------------------------------------------------------------------------------------------------------------------------|

---

|      |                                                                                                                                                                                                                                                                                                                                                                                  |
|------|----------------------------------------------------------------------------------------------------------------------------------------------------------------------------------------------------------------------------------------------------------------------------------------------------------------------------------------------------------------------------------|
| Raza | <input type="radio"/> Indio americano o nativo de Alaska.<br><input type="radio"/> Asiático<br><input type="radio"/> Negro o afroamericano.<br><input type="radio"/> Nativo de Hawai u otra isla del Pacífico.<br><input type="radio"/> Blanco<br><input type="radio"/> Dos o mas razas<br><input type="radio"/> Raza desconocida<br><input type="radio"/> Prefiero no responder |
|------|----------------------------------------------------------------------------------------------------------------------------------------------------------------------------------------------------------------------------------------------------------------------------------------------------------------------------------------------------------------------------------|

---

|                                              |                                                                                                                                                                                                                       |
|----------------------------------------------|-----------------------------------------------------------------------------------------------------------------------------------------------------------------------------------------------------------------------|
| Which ethnic group do you consider yourself? | <input type="radio"/> Hispanic or Latino or Spanish Origin<br><input type="radio"/> Not Hispanic or Latino or Spanish Origin<br><input type="radio"/> Ethnicity Unknown<br><input type="radio"/> Prefer not to answer |
|----------------------------------------------|-----------------------------------------------------------------------------------------------------------------------------------------------------------------------------------------------------------------------|

---

|                                          |                                                                                                                                                                                                                   |
|------------------------------------------|-------------------------------------------------------------------------------------------------------------------------------------------------------------------------------------------------------------------|
| ¿De qué grupo étnico usted se considera? | <input type="radio"/> Origen hispano o latino o español<br><input type="radio"/> No de origen hispano, latino o español<br><input type="radio"/> Etnia desconocida<br><input type="radio"/> Prefiero no responder |
|------------------------------------------|-------------------------------------------------------------------------------------------------------------------------------------------------------------------------------------------------------------------|

---

|                                           |                                                                                                                                                                                                                                                                                            |
|-------------------------------------------|--------------------------------------------------------------------------------------------------------------------------------------------------------------------------------------------------------------------------------------------------------------------------------------------|
| Which is your highest level of education? | <input type="radio"/> Home-school<br><input type="radio"/> No school<br><input type="radio"/> Some school<br><input type="radio"/> GED or equal<br><input type="radio"/> High school graduate<br><input type="radio"/> Associate or Bachelor's<br><input type="radio"/> Master's or higher |
|-------------------------------------------|--------------------------------------------------------------------------------------------------------------------------------------------------------------------------------------------------------------------------------------------------------------------------------------------|

---

|                                          |                                                                                                                                                                                                                                                                                                                                                                 |
|------------------------------------------|-----------------------------------------------------------------------------------------------------------------------------------------------------------------------------------------------------------------------------------------------------------------------------------------------------------------------------------------------------------------|
| ¿Cuál es tu nivel más alto de educación? | <input type="radio"/> Escuela en casa<br><input type="radio"/> No escuela<br><input type="radio"/> Algo de escuela<br><input type="radio"/> Examen de desarrollo de educación general (GED) o igual<br><input type="radio"/> Graduado de escuela secundaria<br><input type="radio"/> Grado de Asociado o Bachiller<br><input type="radio"/> Maestría o superior |
|------------------------------------------|-----------------------------------------------------------------------------------------------------------------------------------------------------------------------------------------------------------------------------------------------------------------------------------------------------------------------------------------------------------------|

---

|                                    |                                                                                                                                                                                                                                                                                                                                                                                                                           |
|------------------------------------|---------------------------------------------------------------------------------------------------------------------------------------------------------------------------------------------------------------------------------------------------------------------------------------------------------------------------------------------------------------------------------------------------------------------------|
| What is your religious preference? | <input type="radio"/> Jewish<br><input type="radio"/> Seventh day Adventist<br><input type="radio"/> Orthodox church<br><input type="radio"/> Catholic<br><input type="radio"/> Mormon<br><input type="radio"/> Muslim<br><input type="radio"/> Christian<br><input type="radio"/> Protestant<br><input type="radio"/> Other (please specify)<br><input type="radio"/> None<br><input type="radio"/> Prefer not to answer |
|------------------------------------|---------------------------------------------------------------------------------------------------------------------------------------------------------------------------------------------------------------------------------------------------------------------------------------------------------------------------------------------------------------------------------------------------------------------------|

---

---

¿Cuál es tu preferencia religiosa?

- Judío
- Adventista del Séptimo Día
- Iglesia Ortodoxa
- Católico
- Mormón
- Musulmán
- Cristiano
- Protestante
- Otros (especificar)
- Ninguna
- Prefiero no responder

---

Other

\_\_\_\_\_

---

Otro

\_\_\_\_\_

---

What is your current marital or civil status?

- Married / Cohabited
- Divorced/ Separated
- Single
- Widowed

---

¿Cuál es su estado civil o civil actual?

- Casado / Conviviente
- Divorciados / separados
- Soltero
- Viudo

---

Who provides the source of income in your home?

- Self
- Partner
- Parents
- Older relatives
- Pension
- Government support (welfare)
- Other

---

¿Quién proporciona la fuente de ingresos en su hogar?

- Yo
- Compañero
- Padres
- Parientes mayores
- Pensión
- Apoyo gubernamental (bienestar)
- Otro

---

How much total combined money did all members of your household earn in the last year, including social security and welfare programs?

- < 15 000 USD
- 15 000 - 20 000 USD
- 21 000 - 30 000 USD
- 31 000 - 45 000 USD
- 46 000 - 60 000 USD
- 61 000 - 120 000 USD
- >120 000 USD

---

¿Cuánto es el ingreso familiar en total, combinando el dinero de todos los miembros de su hogar en el último año, incluidos los programas de seguridad social y bienestar?

- < 15 000 USD
- 15 000 - 20 000 USD
- 21 000 - 30 000 USD
- 31 000 - 45 000 USD
- 46 000 - 60 000 USD
- 61 000 - 120 000 USD
- >120 000 USD

---

Including yourself, how many people live in your household?

\_\_\_\_\_

---

Incluyéndose, ¿cuántas personas comparten los gastos en su hogar?

\_\_\_\_\_

---

Do you or your family receive any form of financial support from the government per month?

- Yes  
 No

---

¿Usted o su familia reciben algún tipo de apoyo financiero del gobierno por mes?

- Si  
 No

---

What is your employment status?

- Never worked  
 Unemployed  
 Formally employed  
 Self-employed  
 Retired  
 Other

---

¿Cuál es tu situación laboral?

- Nunca trabajado  
 Desempleado  
 Empleado formalmente  
 Trabajador por cuenta propia (independiente)  
 Retirado  
 Otro

---

How many hours per week do YOU normally work, including overtime and paid work outside the home?

\_\_\_\_\_

---

¿Cuántas horas a la semana trabaja USTED normalmente, incluyendo horas extras y trabajo remunerado fuera del hogar?

\_\_\_\_\_

---

Select the description that comes closest to your present WORK SHIFT

- Rotating eight-hour shift  
 Rotating twelve-hour shift  
 Permanent day shift  
 Permanent evening shift  
 Permanent night shift  
 Other: \_\_\_\_\_ (detail)

---

Seleccione la descripción que más se acerque a su HORARIO DE TRABAJO actual

- Turno rotativo de ocho horas  
 Turno rotativo de doce horas  
 Turno de día permanente  
 Turno vespertino/tarde permanente  
 Turno nocturno permanente  
 Otro: \_\_\_\_\_ (detalle)

---

Other

\_\_\_\_\_

---

Otro

\_\_\_\_\_

## Household work / Trabajo doméstico

How many hours do you generally need for the housework?

- More than 6h daily
- 3-6
- 1-3
- Less than 1

¿Cuántas horas necesita generalmente para las tareas del hogar?

- Más de 6 horas diarias.
- 3-6
- 1-3
- Menos que 1

## Trial awareness / Concientización sobre estudios clínicos

Has your doctor or other health care professional ever talked to you about medical research?

- Yes
- No
- Not sure

¿Le ha hablado alguna vez su médico u otro profesional de la salud sobre la investigación médica?

- Sí
- No
- No estoy seguro

If your doctor found a clinical trial for you and recommended you join; how likely would you be to participate in a clinical trial?

- Very likely
- somewhat likely
- not likely
- would not participate
- not sure

Si su médico encontró un ensayo clínico para usted y le recomendó unirse; ¿Qué tan probable sería participar en un ensayo clínico?

- Muy probable
- Algo probable
- No es probable
- no participaría
- No estoy seguro

Have you ever been asked to participate in a clinical trial?

- Yes
- No

¿Alguna vez se le ha pedido que participe en un estudio clínico?

- Si
- No

## Trial participation / Participación en estudios

In your lifetime, in how many trials have you taken part?

- I have participated in
- I have never participated in a clinical trial

Please write the number

\_\_\_\_\_

En su vida, ¿en cuántos estudios clínicos has participado?

- He participado en ...
- Nunca he participado en estudios clínicos

Por favor, escriba en número

\_\_\_\_\_

---

When you were asked to participate in the trial, what happened? If you have been asked to participate in more than one clinical trial, please think about just the most recent one

- I took part and am still in the trial
- I took part and completed the trial
- I took part but withdrew before the end
- I wanted to take part but was not eligible
- I declined to take part in the trial

---

Cuando le pidieron que participara en el estudio, ¿qué pasó? Si le han pedido que participe en más de un estudio clínico, piense solo en el más reciente.

- Participé y todavía estoy en el estudio.
- Participé y completé el estudio
- Participé pero me retiré antes que termine el estudio
- Quería participar pero no era elegible
- Me negué a participar en el estudio.

---

Thinking about the most recent trial, did you ever consider withdrawing your consent, dropping out, or leaving the clinical trial early?

- Yes
- No

---

Pensando en el estudio más reciente, ¿alguna vez consideró retirar su consentimiento, abandonar o retirarse del estudio clínico antes?

- Si
- No

---

How did you find out the last clinical trial you participated in?

- Partners healthcare network (hospital, website or rally)
- Online/internet advertisements
- Social Network (Facebook, Instagram, others)
- Media (TV and Radio)
- Flyers
- Doctor / healthcare provider
- Friends/Family
- Patient Organization
- Other
- Not sure
- I have never participated in a clinical trial

---

¿Cómo se enteró del último estudio clínico en el que participó?

- Partners Healthcare Network (hospital, sitio web o rally)
- Anuncios en línea / internet
- Red social (Facebook, Instagram, otros)
- Medios (TV y radio)
- Volantes/Flyers
- Médico / proveedor de atención médica
- Amigos / familia
- Organización del paciente
- Otro
- No estoy seguro
- Nunca he participado en estudios clínicos



**If you were thinking about joining a new clinical trial, how important would the following factors be in your consideration?**

|                                                                                  | Very important        | Somewhat important    | Not very important    | Not at all important  |
|----------------------------------------------------------------------------------|-----------------------|-----------------------|-----------------------|-----------------------|
| The potential negative impact the trial could have on my health                  | <input type="radio"/> | <input type="radio"/> | <input type="radio"/> | <input type="radio"/> |
| The distance I would have to travel for my trial visits                          | <input type="radio"/> | <input type="radio"/> | <input type="radio"/> | <input type="radio"/> |
| Keeping my current doctor during the trial                                       | <input type="radio"/> | <input type="radio"/> | <input type="radio"/> | <input type="radio"/> |
| The side effects that might come from being on a new treatment                   | <input type="radio"/> | <input type="radio"/> | <input type="radio"/> | <input type="radio"/> |
| The possibility that I might be given a placebo (inactive treatment)             | <input type="radio"/> | <input type="radio"/> | <input type="radio"/> | <input type="radio"/> |
| The friendliness of the clinical and researchers                                 | <input type="radio"/> | <input type="radio"/> | <input type="radio"/> | <input type="radio"/> |
| The number of visits and total time per month to participate                     | <input type="radio"/> | <input type="radio"/> | <input type="radio"/> | <input type="radio"/> |
| Being given the results of my trial after my participation had ended             | <input type="radio"/> | <input type="radio"/> | <input type="radio"/> | <input type="radio"/> |
| Having the option to continue on the new treatment after the trial had concluded | <input type="radio"/> | <input type="radio"/> | <input type="radio"/> | <input type="radio"/> |
| The reputation of people or the institution conducting the research              | <input type="radio"/> | <input type="radio"/> | <input type="radio"/> | <input type="radio"/> |
| An opportunity to possibly improve my own health                                 | <input type="radio"/> | <input type="radio"/> | <input type="radio"/> | <input type="radio"/> |
| Privacy and confidentiality issues                                               | <input type="radio"/> | <input type="radio"/> | <input type="radio"/> | <input type="radio"/> |
| The opportunity to improve the health of others                                  | <input type="radio"/> | <input type="radio"/> | <input type="radio"/> | <input type="radio"/> |
| My physician's recommendation                                                    | <input type="radio"/> | <input type="radio"/> | <input type="radio"/> | <input type="radio"/> |
| Whether I would be paid to participate                                           | <input type="radio"/> | <input type="radio"/> | <input type="radio"/> | <input type="radio"/> |

**Si ha pensado en unirse a un nuevo estudio clínico, ¿qué importancia tendría los siguientes factores para considerarlo?**

|                                                                                                | Muy importante        | Algo importante       | No es muy importante  | No importa            |
|------------------------------------------------------------------------------------------------|-----------------------|-----------------------|-----------------------|-----------------------|
| El posible impacto negativo que el estudio podría tener en mi salud                            | <input type="radio"/> | <input type="radio"/> | <input type="radio"/> | <input type="radio"/> |
| La distancia que tendría que recorrer para mis visitas de prueba                               | <input type="radio"/> | <input type="radio"/> | <input type="radio"/> | <input type="radio"/> |
| Manteniendo a mi médico actual durante el estudio                                              | <input type="radio"/> | <input type="radio"/> | <input type="radio"/> | <input type="radio"/> |
| Los efectos secundarios que pueden derivarse de un nuevo tratamiento                           | <input type="radio"/> | <input type="radio"/> | <input type="radio"/> | <input type="radio"/> |
| La posibilidad de que me den un placebo (tratamiento inactivo)                                 | <input type="radio"/> | <input type="radio"/> | <input type="radio"/> | <input type="radio"/> |
| La amabilidad de los clínicos y los investigadores.                                            | <input type="radio"/> | <input type="radio"/> | <input type="radio"/> | <input type="radio"/> |
| El número de visitas y el tiempo total por mes para participar.                                | <input type="radio"/> | <input type="radio"/> | <input type="radio"/> | <input type="radio"/> |
| Recibir los resultados de mi prueba después de que mi participación haya finalizado            | <input type="radio"/> | <input type="radio"/> | <input type="radio"/> | <input type="radio"/> |
| Tener la opción de continuar con el nuevo tratamiento después de que el estudio haya concluido | <input type="radio"/> | <input type="radio"/> | <input type="radio"/> | <input type="radio"/> |
| La reputación de las personas o la institución que realiza la investigación.                   | <input type="radio"/> | <input type="radio"/> | <input type="radio"/> | <input type="radio"/> |
| Una oportunidad para posiblemente mejorar mi propia salud                                      | <input type="radio"/> | <input type="radio"/> | <input type="radio"/> | <input type="radio"/> |
| Problemas de privacidad y confidencialidad.                                                    | <input type="radio"/> | <input type="radio"/> | <input type="radio"/> | <input type="radio"/> |
| La oportunidad de mejorar la salud de los demás.                                               | <input type="radio"/> | <input type="radio"/> | <input type="radio"/> | <input type="radio"/> |
| Recomendación de mi médico                                                                     | <input type="radio"/> | <input type="radio"/> | <input type="radio"/> | <input type="radio"/> |
| Si me pagarían por participar                                                                  | <input type="radio"/> | <input type="radio"/> | <input type="radio"/> | <input type="radio"/> |

How did you find out about this clinical trial?

- Partners healthcare network (hospital, website or rally)
- Online/internet advertisements
- Social Network (Facebook, Instagram, others)
- Media (TV and Radio)
- Flyers
- Doctor / healthcare provider
- Friends/Family
- Patient Organization
- Other
- Not sure

¿Cómo se enteró de este ensayo clínico?

- Partners Healthcare Network (hospital, sitio web o rally)
- Anuncios en línea / internet
- Red social (Facebook, Instagram, otros)
- Medios (TV y radio)
- Volantes/Flyers
- Médico / proveedor de atención médica
- Amigos / familia
- Organización del paciente
- Otro
- No estoy seguro

### Social Support

|                                                                                                                                       | None of the time      | A little of the time  | Some of the time      | Most of the time      | All of the time       |
|---------------------------------------------------------------------------------------------------------------------------------------|-----------------------|-----------------------|-----------------------|-----------------------|-----------------------|
| How often you have someone you can count on to listen to you when you need to talk about yourself? Choose one category from each line | <input type="radio"/> |

### Soporte social

|                                                                                                                                    | En ningún momento     | Un poco de tiempo     | Algo de tiempo        | La mayor parte del tiempo | Todo el tiempo        |
|------------------------------------------------------------------------------------------------------------------------------------|-----------------------|-----------------------|-----------------------|---------------------------|-----------------------|
| ¿Con qué frecuencia tiene a alguien con quien puede escuchar cuando necesita hablar sobre usted? Elige una categoría de cada línea | <input type="radio"/> | <input type="radio"/> | <input type="radio"/> | <input type="radio"/>     | <input type="radio"/> |

### Mental health

Over the last 2 weeks, how often have you been bother by the following problem?

|                                     | Not at all            | Several days          | More than half the days | Nearly every day      |
|-------------------------------------|-----------------------|-----------------------|-------------------------|-----------------------|
| Feeling down, depressed or hopeless | <input type="radio"/> | <input type="radio"/> | <input type="radio"/>   | <input type="radio"/> |

## Salud mental

**Durante las últimas 2 semanas, ¿con qué frecuencia se ha sentido afectado por los siguientes problemas?**

|                                            | Nunca                 | Varios días           | Mas de la mitad de los días | Casi todos los días   |
|--------------------------------------------|-----------------------|-----------------------|-----------------------------|-----------------------|
| Sentirse decaído, deprimido o desesperado? | <input type="radio"/> | <input type="radio"/> | <input type="radio"/>       | <input type="radio"/> |
