# Supplementary material for: Barriers and facilitators for clinical trial participation of underrepresented and non-underrepresented fibromyalgia patients: A cross-sectional internet survey
Source: PubMed Central journal article supplement — Heliyon. 2021 Jul 5;7(7):e07475. doi: 10.1016/j.heliyon.2021.e07475 (PMC8278426; doi:10.1016/j.heliyon.2021.e07475), 2021-07-05
Supplement: mmc2.pdf [file mmc2.pdf]

**Supplementary table S2.** Univariate logistic regression models

| Characteristics                                | Overall sample (n=481) |         | Characteristics                                     | Underrepresented sample (n=168) |         |
|------------------------------------------------|------------------------|---------|-----------------------------------------------------|---------------------------------|---------|
|                                                | OR                     | P value |                                                     | OR                              | P value |
| Physician                                      | 2.64                   | 0.01    | Low-income category                                 | 6.2                             | 0.017   |
| Time of diagnosis category                     | 2.22                   | 0.01    | Willingness of participation                        | 3.17                            | 0.05    |
| Willingness of participation                   | 2.03                   | 0.023   | Physician question (from Likert scale)              | 2.88                            | 0.169   |
| Low-education category                         | 1.97                   | 0.24    | Support survey                                      | 2.81                            | 0.084   |
| Presence of government support                 | 1.53                   | 0.142   | Low-education category                              | 2.43                            | 0.152   |
| Low-income category                            | 1.52                   | 0.193   | Time of diagnosis category                          | 1.85                            | 0.24    |
| Payment question (from Likert scale)           | 1.49                   | 0.172   | Age                                                 | 1.04                            | 0.073   |
| Current doctor question (from Likert scale)    | 1.46                   | 0.22    | Pain score                                          | 0.83                            | 0.26    |
| Diagnosis time in years                        | 1.03                   | 0.009   | Distance question (from Likert scale)               | 0.7                             | 0.22    |
| Age (in years)                                 | 1.02                   | 0.019   | Negative question (from Likert scale)               | 0.62                            | 0.11    |
| Distance question (from Likert scale)          | 0.69                   | 0.194   | Side effects question (from Likert scale)           | 0.58                            | 0.26    |
| Placebo question (from Likert scale)           | 0.69                   | 0.21    | Physician question (from Likert scale)              | 0.56                            | 0.272   |
| Continue question (from Likert scale)          | 0.64                   | 0.134   | Reputation question (from Likert scale)             | 0.55                            | 0.26    |
| Other health question (from Likert scale)      | 0.63                   | 0.147   | Privacy question (from Likert scale)                | 0.51                            | 0.169   |
| Number visits question (from Likert scale)     | 0.63                   | 0.128   | Race/ethnicity category                             | 0.51                            | 0.256   |
| Number of hours used for housework             | 0.62                   | 0.129   | Other health question (from Likert scale)           | 0.5                             | 0.23    |
| Number visits question (from Likert scale)     | 0.61                   | 0.145   | Placebo question (from Likert scale)                | 0.5                             | 0.167   |
| Negative outcomes question (from Likert scale) | 0.6                    | 0.086   | Continue question (from Likert scale)               | 0.4                             | 0.07    |
| Friendliness question (from Likert scale)      | 0.56                   | 0.174   | Placebo question (from Likert scale)                | 0.4                             | 0.116   |
| Race/ethnicity category                        | 0.5                    | 0.197   | Employment category                                 | 0.39                            | 0.22    |
| Results question (from Likert scale)           | 0.47                   | 0.015   | Number of hours used for housework                  | 0.38                            | 0.113   |
| Employment category                            | 0.4                    | 0.029   | Friend question (from Likert scale)                 | 0.34                            | 0.028   |
| Results question (from Likert scale)           | 0.47                   | 0.015   | Marital status category                             | 0.32                            | 0.07    |
| Employment category                            | 0.4                    | 0.029   | Results question (from Likert scale)                | 0.25                            | 0.008   |
| Employment category                            | 0.4                    | 0.029   | Own health improvement question (from Likert scale) | 0.23                            | 0.241   |

|                     |     |       |                                      |      |       |
|---------------------|-----|-------|--------------------------------------|------|-------|
| Employment category | 0.4 | 0.029 | Results question (from Likert scale) | 0.15 | 0.003 |
|                     |     |       | Results question (from Likert scale) | 0.15 | 0.003 |
|                     |     |       | Results question (from Likert scale) | 0.15 | 0.003 |

Dependent variable: clinical trial participation (yes=1, no=0).
